# Supplementary material for: Doubling the known diversity of a remote island fauna: marine bivalves of the Juan Fernández and Desventuradas oceanic archipelagos (Southeastern Pacific Ocean)
Source: PeerJ. 2024 Jun 28;12:e17305. doi: 10.7717/peerj.17305 (PMC11216210; doi:10.7717/peerj.17305)
Supplement: Supplemental Information 1 [file peerj-12-17305-s001.xlsx]

## Sheet: Specimen lots
Family	Species	FMNH	LACM	USNM	MNHN-CL	transfer origin	FMNH number assigned to partially transferred lot	type status	article images from this lot	prior ID if different	Station	specimen counts	URL
Nuculidae	Nucula fernandensis Villarroel, 1971	322327							Fig. 2 M (SEM)		IOC97-66A	12 avs, 8 vs	https://collections-zoology.fieldmuseum.org/catalogue/4630834
Nuculidae	Nucula fernandensis Villarroel, 1971				101609	ex FMNH 322327	327897				IOC97-66A	3 avs	https://collections-zoology.fieldmuseum.org/catalogue/4671758
Nuculidae	Nucula fernandensis Villarroel, 1971	322328									IOC97-44A	1 av	https://collections-zoology.fieldmuseum.org/catalogue/4630833
Nuculidae	Nucula fernandensis Villarroel, 1971	322329							Fig. 2 N, O		IOC97-50A	9 avs, 3 vs	https://collections-zoology.fieldmuseum.org/catalogue/4630830
Nuculidae	Nucula fernandensis Villarroel, 1971		1966-98.1						Fig. 2 E, F	Nucula pisum	66-98	2vs	n/a
Nuculidae	Nucula fernandensis Villarroel, 1971		1966.100.1						Fig. 2 G-L	Nucula pisum	66-100	3 avs, 48 vs	n/a
Nuculidae	Nucula fernandensis Villarroel, 1971		1966-101.1						Fig. 2 A-D	bivalve sp.	66-101	1 av, 6 vs	n/a
Nuculidae	Nucula fernandensis Villarroel, 1971		1966-102.1							Nucula pisum	66-102	3 vs	n/a
Tindariidae	Tindaria sanfelixensis n. sp.		3820					Paratype(s)	Fig. 3 C, D, I, J	Nucula grayi	66-98	3 avs, 14 vs, 2 fragments	n/a
Tindariidae	Tindaria sanfelixensis n. sp.		3819					Holotype	Fig. 3 A, B	Nucula grayi	66-98	1 v	n/a
Tindariidae	Tindaria sanfelixensis n. sp.	312472				ex LACM 3820		Paratype(s)	Fig. 3 E-H		66-98	2 vs	https://collections-zoology.fieldmuseum.org/catalogue/4677037
Tindariidae	Tindaria sanfelixensis n. sp.				101610	ex LACM 3820		Paratype(s)			66-98	2 vs	n/a
Nuculanidae	Ledella costulata n. sp.		3821					Holotype	Fig. 4 A, B		66-98	1 v	n/a
Mytilidae	Amygdalum sp.		1965-98.1						Fig. 5 A-D	Amygdalum americanum	65-98.1	10 avs, 1 v	n/a
Mytilidae	Gregariella exilis (Philippi, 1847)	322288							Fig. 5 K, L		IOC97-29	20 vs	https://collections-zoology.fieldmuseum.org/catalogue/4631741
Mytilidae	Gregariella exilis (Philippi, 1847)	322289							Fig. 5 E, F		IOC97-44A	4 vs	https://collections-zoology.fieldmuseum.org/catalogue/4631792
Mytilidae	Gregariella exilis (Philippi, 1847)	322290							Fig. 5 G, J		IOC97-68A	5 vs	https://collections-zoology.fieldmuseum.org/catalogue/4631796
Mytilidae	Gregariella exilis (Philippi, 1847)	322291									IOC97-12	1 v, 1 fragment	https://collections-zoology.fieldmuseum.org/catalogue/4631772
Mytilidae	Gregariella exilis (Philippi, 1847)	322292									IOC97-13	5 vs	https://collections-zoology.fieldmuseum.org/catalogue/4631781
Mytilidae	Gregariella exilis (Philippi, 1847)	322293									IOC97-18	1 fragment	https://collections-zoology.fieldmuseum.org/catalogue/4631784
Mytilidae	Gregariella exilis (Philippi, 1847)	322294									IOC97-26	1 avs, 20 vs	https://collections-zoology.fieldmuseum.org/catalogue/4631836
Mytilidae	Gregariella exilis (Philippi, 1847)				101611	ex FMNH 322294	327898				IOC97-26	20 vs	https://collections-zoology.fieldmuseum.org/catalogue/4671763
Mytilidae	Gregariella exilis (Philippi, 1847)	322295									IOC97-30	1 v	https://collections-zoology.fieldmuseum.org/catalogue/4631742
Mytilidae	Gregariella exilis (Philippi, 1847)	322296									IOC97-32	3 vs	https://collections-zoology.fieldmuseum.org/catalogue/4631871
Mytilidae	Gregariella exilis (Philippi, 1847)	322297									IOC97-48A	1 v	https://collections-zoology.fieldmuseum.org/catalogue/4631787
Mytilidae	Gregariella exilis (Philippi, 1847)	322298									IOC97-57A	1 v	https://collections-zoology.fieldmuseum.org/catalogue/4637498
Mytilidae	Gregariella exilis (Philippi, 1847)	322299									IOC97-50A	2 vs	https://collections-zoology.fieldmuseum.org/catalogue/4631790
Mytilidae	Gregariella exilis (Philippi, 1847)		1965-95.1							Gregariella chenui	65-95	3 avs, 5 vs	n/a
Mytilidae	Gregariella exilis (Philippi, 1847)		1966-98.2							Gregariella chenui	66-98	fragments	n/a
Mytilidae	Gregariella exilis (Philippi, 1847)		1966-99.1							Gregariella chenui	66-99	1 v, fragments	n/a
Mytilidae	Gregariella exilis (Philippi, 1847)		1966-100.2							Gregariella chenui	66-100	3 vs	n/a
Mytilidae	Modiolus aurum Osorio, 1979	322262							Fig. 5 M-T		IOC97-44	2 avs	https://collections-zoology.fieldmuseum.org/catalogue/4631822
Mytilidae	Modiolus aurum Osorio, 1979				100230			Holotype				1	n/a
Mytilidae	Modiolus aurum Osorio, 1979				100231			Paratype(s)				1	n/a
Mytilidae	Modiolus aurum Osorio, 1979				100232			Paratype(s)				1	n/a
Mytilidae	Modiolus aurum Osorio, 1979				101612	ex FMNH 322262	327899				IOC97-44	1 av, 4 vs	https://collections-zoology.fieldmuseum.org/catalogue/4671767
Mytilidae	Modiolus aurum Osorio, 1979	322263									IOC97-57	3 avs	https://collections-zoology.fieldmuseum.org/catalogue/4631834
Mytilidae	Modiolus aurum Osorio, 1979	322264									IOC97-57A	5 vs	https://collections-zoology.fieldmuseum.org/catalogue/4630836
Mytilidae	Modiolus aurum Osorio, 1979	322265									IOC97-16	2 avs	https://collections-zoology.fieldmuseum.org/catalogue/4631810
Mytilidae	Modiolus aurum Osorio, 1979	322266									IOC97-44	1 spec.	https://collections-zoology.fieldmuseum.org/catalogue/4631826
Mytilidae	Modiolus aurum Osorio, 1979	322268									IOC97-68A	5 vs	https://collections-zoology.fieldmuseum.org/catalogue/4631839
Mytilidae	Modiolus aurum Osorio, 1979	322269									IOC97-66A	3 vs	https://collections-zoology.fieldmuseum.org/catalogue/4631838
Mytilidae	Modiolus aurum Osorio, 1979	322270									IOC97-44A	6 vs, fragments	https://collections-zoology.fieldmuseum.org/catalogue/4631830
Mytilidae	Modiolus aurum Osorio, 1979		1965-94.1								65-94	2 vs	n/a
Mytilidae	Modiolus aurum Osorio, 1979		1965-95.2								65-95	2 vs	n/a
Mytilidae	Modiolus aurum Osorio, 1979		1965-96.1								65-96	2 avs	n/a
Mytilidae	Modiolus aurum Osorio, 1979		1965-97.1								65-97	2 avs	n/a
Mytilidae	Modiolus aurum Osorio, 1979		1965-101.2								65-101	7 avs, 1 v	n/a
Mytilidae	Modiolus aurum Osorio, 1979		1966-100.3								66-100	4 vs	n/a
Mytilidae	Modiolus aurum Osorio, 1979			887909							Eltanin 21-203	3 specimens, 1 av	http://n2t.net/ark:/65665/3e0065b97-d673-4c2a-a636-d11143f91b0c
Arcidae	Acar pusilla (Sowerby I, 1833)		1965-94.2						Fig. 6 A-D		65-94.2	2 vs	n/a
Arcidae	Acar bernardi n. sp.		3822					Holotype	Fig. 6 E, F	Hiatella solida	66-99	1 v	n/a
Arcidae	Acar bernardi n. sp.		3823					Paratype(s)	Fig. 6 G, H	Hiatella solida	66-99	1 v	n/a
Arcidae	Acar bernardi n. sp.	312477				ex LACM 3823		Paratype(s)	Fig. 6 I, J	Hiatella solida	66-99	1 v	https://collections-zoology.fieldmuseum.org/catalogue/4677054
Arcidae	Tetrarca fernandezensis (Hertlein & A. M. Strong, 1943)	322271							Fig. 6 W, X		IOC97-44	6 avs, 5 vs	https://collections-zoology.fieldmuseum.org/catalogue/4631771
Arcidae	Tetrarca fernandezensis (Hertlein & A. M. Strong, 1943)	322272							Fig. 6 AA-CC		IOC97-50A	12 vs juvenile	https://collections-zoology.fieldmuseum.org/catalogue/4631870
Arcidae	Tetrarca fernandezensis (Hertlein & A. M. Strong, 1943)	322273							Fig. 6 DD, EE		IOC97-66A	7 v	https://collections-zoology.fieldmuseum.org/catalogue/4634414
Arcidae	Tetrarca fernandezensis (Hertlein & A. M. Strong, 1943)	322274							Fig. 6 U, V		IOC97-57	1 av	https://collections-zoology.fieldmuseum.org/catalogue/4631875
Arcidae	Tetrarca fernandezensis (Hertlein & A. M. Strong, 1943)	322276									IOC97-44A	46 vs, juvenile	https://collections-zoology.fieldmuseum.org/catalogue/4631873
Arcidae	Tetrarca fernandezensis (Hertlein & A. M. Strong, 1943)	322277									IOC97-68A	17 vs juvenile	https://collections-zoology.fieldmuseum.org/catalogue/4634415
Arcidae	Tetrarca fernandezensis (Hertlein & A. M. Strong, 1943)	322278									IOC97-48A	12 vs juvenile	https://collections-zoology.fieldmuseum.org/catalogue/4631867
Arcidae	Tetrarca fernandezensis (Hertlein & A. M. Strong, 1943)	322279									IOC97-50	9 vs	https://collections-zoology.fieldmuseum.org/catalogue/4631869
Arcidae	Tetrarca fernandezensis (Hertlein & A. M. Strong, 1943)	322280									IOC97-26	11 vs	https://collections-zoology.fieldmuseum.org/catalogue/4631860
Arcidae	Tetrarca fernandezensis (Hertlein & A. M. Strong, 1943)				101613	ex FMNH 322280	327895				IOC97-26	12 vs juvenile	https://collections-zoology.fieldmuseum.org/catalogue/4671638
Arcidae	Tetrarca fernandezensis (Hertlein & A. M. Strong, 1943)				101614	ex FMNH 322275					IOC97-57A	12 vs juvenile	https://collections-zoology.fieldmuseum.org/catalogue/4677028
Arcidae	Tetrarca fernandezensis (Hertlein & A. M. Strong, 1943)				101615	ex FMNH 322267					IOC97-66A	2 avs, 2vs	https://collections-zoology.fieldmuseum.org/catalogue/4677027
Arcidae	Tetrarca fernandezensis (Hertlein & A. M. Strong, 1943)	322281									IOC97-30	1 v	https://collections-zoology.fieldmuseum.org/catalogue/4631863
Arcidae	Tetrarca fernandezensis (Hertlein & A. M. Strong, 1943)	322282									IOC97-29	2 vs	https://collections-zoology.fieldmuseum.org/catalogue/4631861
Arcidae	Tetrarca fernandezensis (Hertlein & A. M. Strong, 1943)	322283									IOC97-32	6 vs	https://collections-zoology.fieldmuseum.org/catalogue/4631864
Arcidae	Tetrarca fernandezensis (Hertlein & A. M. Strong, 1943)	322284									IOC97-64	1 spec	https://collections-zoology.fieldmuseum.org/catalogue/4631883
Arcidae	Tetrarca fernandezensis (Hertlein & A. M. Strong, 1943)	322285									IOC97-48	3 specs	https://collections-zoology.fieldmuseum.org/catalogue/4631865
Arcidae	Tetrarca fernandezensis (Hertlein & A. M. Strong, 1943)	322286									IOC97-57	4 specs	https://collections-zoology.fieldmuseum.org/catalogue/4631881
Arcidae	Tetrarca fernandezensis (Hertlein & A. M. Strong, 1943)	322287									IOC97-48	4 specs	https://collections-zoology.fieldmuseum.org/catalogue/4631866
Arcidae	Tetrarca fernandezensis (Hertlein & A. M. Strong, 1943)		1965-95.3								65-95	1 av, 15 vs	n/a
Arcidae	Tetrarca fernandezensis (Hertlein & A. M. Strong, 1943)		10496						Fig. 6 Y, Z			2 av	n/a
Arcidae	Tetrarca fernandezensis (Hertlein & A. M. Strong, 1943)		1965-96.2								65-96	2 vs	n/a
Arcidae	Tetrarca fernandezensis (Hertlein & A. M. Strong, 1943)		1965-97.2								65-97	4 vs	n/a
Arcidae	Tetrarca fernandezensis (Hertlein & A. M. Strong, 1943)		1966-98.3								66-98	3 vs juvenile	n/a
Arcidae	Tetrarca fernandezensis (Hertlein & A. M. Strong, 1943)		1965-99.2								65-99	3 vs juvenile	n/a
Arcidae	Tetrarca fernandezensis (Hertlein & A. M. Strong, 1943)		1965-101.3								65-101	1 v	n/a
Arcidae	Tetrarca fernandezensis (Hertlein & A. M. Strong, 1943)		1965-103.1								65-103	1 v	n/a
Arcidae	Tetrarca fernandezensis (Hertlein & A. M. Strong, 1943)		1966-100.4								66-100	14 vs juvenile	n/a
Arcidae	Tetrarca fernandezensis (Hertlein & A. M. Strong, 1943)			1548474							Eltanin 21-203	1 av juvenile	n/a
Glycymerididae	Tucetona sanfelixensis n. sp.				101616	ex FMNH 322250	327892	Holotype	Fig. 7 A, B		IOC97-39	1 v	https://collections-zoology.fieldmuseum.org/catalogue/4671635
Glycymerididae	Tucetona sanfelixensis n. sp.	322250						Paratype(s)	Fig. 7 E, F		IOC97-39	4 vs	https://collections-zoology.fieldmuseum.org/catalogue/4634420
Glycymerididae	Tucetona sanfelixensis n. sp.				101617	ex FMNH 322250	327893	Paratype(s)	Fig. 7 C, D		IOC97-39	1 v	https://collections-zoology.fieldmuseum.org/catalogue/4671636
Glycymerididae	Tucetona sanfelixensis n. sp.		3824			ex FMNH 322250	327894	Paratype(s)			IOC97-39	1 v	https://collections-zoology.fieldmuseum.org/catalogue/4671637
Philobryidae	Philobrya aequivalvis (Odhner, 1922)	322234									IOC97-57A	1 v	https://collections-zoology.fieldmuseum.org/catalogue/4636747
Philobryidae	Philobrya aequivalvis (Odhner, 1922)	322235									IOC97-48A	2 vs	https://collections-zoology.fieldmuseum.org/catalogue/4636750
Philobryidae	Philobrya aequivalvis (Odhner, 1922)	322236									IOC97-44A	21 vs	https://collections-zoology.fieldmuseum.org/catalogue/4636751
Philobryidae	Philobrya aequivalvis (Odhner, 1922)	322237							Fig. 9 G		IOC97-50A	12 vs	https://collections-zoology.fieldmuseum.org/catalogue/4636752
Philobryidae	Philobrya aequivalvis (Odhner, 1922)	322239							Fig. 9 K, L		IOC97-66A	53 vs, 2 fragments	https://collections-zoology.fieldmuseum.org/catalogue/4636753
Philobryidae	Philobrya aequivalvis (Odhner, 1922)				101618	ex FMNH 322239	327896				IOC97-66A	40 vs	https://collections-zoology.fieldmuseum.org/catalogue/4671639
Philobryidae	Philobrya aequivalvis (Odhner, 1922)		1965-97.3						Fig. 9 C	Philobrya antarctica	65-97	1 av	n/a
Philobryidae	Philobrya aequivalvis (Odhner, 1922)		1965-98.2							Philobrya brattstroemi	65-98	1 av	n/a
Philobryidae	Philobrya aequivalvis (Odhner, 1922)		1965-101.4						Fig. 9 D	Philobrya brattstroemi	65-101	2 avs	n/a
Philobryidae	Philobrya aequivalvis (Odhner, 1922)		1965-103.2							Philobrya brattstroemi	65-103	1 av	n/a
Philobryidae	Philobrya aequivalvis (Odhner, 1922)			886931					Fig. 9 H-J	Philobrya brattstromi	Eltanin 21-203	> 500 specs	http://n2t.net/ark:/65665/32518a2ba-7f9d-4d91-9293-e6d9640cb34f
Philobryidae	Philobrya aequivalvis (Odhner, 1922)			904366						Philobrya sublaevis	Eltanin 21-203	> 200 specs, mostly juvenile	http://n2t.net/ark:/65665/3315539bf-ff99-4142-978e-ab106a39ea22
Philobryidae	Philobrya aequivalvis (Odhner, 1922)			870044						Philobrya brattstromi	Eltanin 21-205	2 avs	http://n2t.net/ark:/65665/32518a2ba-7f9d-4d91-9293-e6d9640cb34f
Philobryidae	Verticipronus denticulatus n. sp.				101619	ex FMNH 322238	327900	Holotype	Fig. 9 M, N		IOC97-50A	1 v	https://collections-zoology.fieldmuseum.org/catalogue/4676874
Philobryidae	Verticipronus denticulatus n. sp.	322238						Paratype(s)	Fig. 9 O-S (Q-S, SEM)		IOC97-50A	6 vs	https://collections-zoology.fieldmuseum.org/catalogue/4636754
Philobryidae	Verticipronus denticulatus n. sp.				101620	ex FMNH 322238	327901	Paratype(s)			IOC97-50A	2 vs	https://collections-zoology.fieldmuseum.org/catalogue/4676875
Anomiidae	Monia sp. B	322336							Fig. 10 E, F		IOC97-29	1 v	https://collections-zoology.fieldmuseum.org/catalogue/4636755
Anomiidae	Monia sp. B	322337							Fig. 10 A, B		IOC97-22	1 v	https://collections-zoology.fieldmuseum.org/catalogue/4636756
Anomiidae	Monia sp. B	322338									IOC97-32	1 v	https://collections-zoology.fieldmuseum.org/catalogue/4636757
Pectinidae	Argopecten purpuratus (Lamarck, 1819)		1965-95.4						Fig. 11 A- D		65-95	1 av	n/a
Pectinidae	Zygochlamys phalara (Roth, 1975)			880644				Paratypes				4 avs	http://n2t.net/ark:/65665/352724543-c151-49c2-a03c-2c0c7ba3a09d
Pectinidae	Zygochlamys phalara (Roth, 1975)			846081								1 av	http://n2t.net/ark:/65665/3848df294-b46d-4d89-b543-3d01e4423050
Pectinidae	Zygochlamys phalara (Roth, 1975)			888364								1 av	http://n2t.net/ark:/65665/3e67bd58f-8f97-4315-81ac-78f3d6d76804
Pectinidae	Zygochlamys phalara (Roth, 1975)			870045							Eltanin 21-205	1 av, 3vs	http://n2t.net/ark:/65665/333a4cdaf-5907-4aba-bf3e-0a714ef3cb3e
Pectinidae	Zygochlamys phalara (Roth, 1975)			897774						Chlamys sp.		12 specs juvenile	http://n2t.net/ark:/65665/3d61d9f49-e1a3-471c-b41a-d23f504452ae
Pectinidae	Zygochlamys phalara (Roth, 1975)			764206								1 v	http://n2t.net/ark:/65665/34690ba08-7339-42cd-bf86-366572496691
Pectinidae	Zygochlamys phalara (Roth, 1975)			887914							Eltanin 21-203	1 sp, 1 v	http://n2t.net/ark:/65665/336417f63-c62a-43b5-ade2-f1db63806661
Pectinidae	Zygochlamys phalara (Roth, 1975)		1965-98.3								65-98	62 vs juvenile	n/a
Pectinidae	Zygochlamys phalara (Roth, 1975)		1965-101.5							bivalve sp. (in part)	65-101	8 avs, 48 vs	n/a
Pectinidae	Zygochlamys phalara (Roth, 1975)		1966-102.2								66-102	5 vs	n/a
Pectinidae	Zygochlamys phalara (Roth, 1975)			701662								16 vs	http://n2t.net/ark:/65665/3e5fb93af-2f5a-4eea-8fa4-c9362107a171
Pectinidae	Zygochlamys phalara (Roth, 1975)			846082								2 av	http://n2t.net/ark:/65665/388399ace-5659-4161-90a1-5d5efcfd6072
Pectinidae	Zygochlamys phalara (Roth, 1975)			764199								10 avs, 72 vs	http://n2t.net/ark:/65665/34ad1c291-8fbd-4768-85fa-6fee02ed12ce
Pectinidae	Zygochlamys phalara (Roth, 1975)			679522								5 avs, 10 vs	http://n2t.net/ark:/65665/3fb634337-3e18-4052-86f0-6f5f189a8629
Pectinidae	Zygochlamys phalara (Roth, 1975)			764215								275 vs	http://n2t.net/ark:/65665/340571971-9aec-4b72-8e26-7fc1e1ba1dd5
Pectinidae	Zygochlamys phalara (Roth, 1975)			764195								20 vs	http://n2t.net/ark:/65665/3408722e4-c340-4244-be70-5c65c26b2132; http://n2t.net/ark:/65665/3043a2352-bce7-425e-a7a3-98d2055e034a; http://n2t.net/ark:/65665/3842ba887-1fd1-4533-a106-b61e5c938450
Propeamussiidae	Propeamussium/Parvamussium sp. A		1966-98.4						Fig. 12 A, B	Propeamussium cf. malpelonium	66-98	1 v	n/a
Limidae	Limaria crusoensis n. sp.				101621	ex FMNH 322331		Holotype	Fig. 13 A, B		IOC97-62	1 av	https://collections-zoology.fieldmuseum.org/catalogue/4677024
Limidae	Limaria crusoensis n. sp.		3835					Paratype(s)	Fig. 13 C-F	Promantellum orbignyi	66-100	1 av, 6 vs	n/a
Limidae	Limaria crusoensis n. sp.			887913				Paratype(s)	Fig. 13 G, H	Limatula pygmaea		2 vs	http://n2t.net/ark:/65665/3a52b4b7c-6237-4548-b4f9-48b916dbde72
Limidae	Limaria crusoensis n. sp.	322330						Paratype(s)			IOC97-67	1 v	n/a
Limidae	Limaria crusoensis n. sp.	322332						Paratype(s)			IOC97-44	2 vs	https://collections-zoology.fieldmuseum.org/catalogue/4636761
Limidae	Lima nasca (Bernard, 1988)		1966-99.2						Fig. 13 I-L	Acesta diomedia	66-99	1 av	n/a
Limidae	Lima nasca (Bernard, 1988)		2332					Holotype					n/a
Limidae	Limatula sanfelixensis n. sp.		3825					Holotype	Fig. 13 M, N	Limatula cf. pymaea	66-99	1 v	n/a
Limidae	Limatula sanfelixensis n. sp.		3826					Paratype(s)	Fig. 13 O, P		66-99	1 v, 1 fragment	n/a
Limidae	Limatula sanfelixensis n. sp.	312473				ex LACM 3826		Paratype(s)			66-99	1 v	https://collections-zoology.fieldmuseum.org/catalogue/4677055
Lucinidae	Cavilinga taylorgloverorum n. sp.		3827					Holotype	Fig. 14 A, D	bivalve sp.	65-95	1 v	n/a
Lucinidae	Cavilinga taylorgloverorum n. sp.	322313						Paratypes	Fig. 14 K		IOC97-26	9 avs juv, 28 vs	https://collections-zoology.fieldmuseum.org/catalogue/4636762
Lucinidae	Cavilinga taylorgloverorum n. sp.	322315						Paratypes	Fig. 14 E-J		IOC97-22	1 av, 23 v	n/a
Lucinidae	Cavilinga taylorgloverorum n. sp.				101622	ex FMNH 322315	327902	Paratype(s)			IOC97-22	10 vs	https://collections-zoology.fieldmuseum.org/catalogue/4677008
Lucinidae	Cavilinga taylorgloverorum n. sp.	322316									IOC97-32	4 vs	https://collections-zoology.fieldmuseum.org/catalogue/4636872
Lucinidae	Cavilinga taylorgloverorum n. sp.	322317									IOC97-29	5 vs	https://collections-zoology.fieldmuseum.org/catalogue/4636914
Lucinidae	Cavilinga taylorgloverorum n. sp.	322318									IOC97-68A	1 v	https://collections-zoology.fieldmuseum.org/catalogue/4637227
Lucinidae	Cavilinga taylorgloverorum n. sp.		1965-94.3							bivalve sp.	65-94	3 vs	n/a
Lucinidae	Cavilinga taylorgloverorum n. sp.		1965-98.4							bivalve sp.	65-98	1 v	n/a
Thyasiridae	Thyasira fernandezensis n. sp.		3828					Holotype	Fig. 15 A, B	Axinulus n. sp.	66-100	1 v	n/a
Thyasiridae	Thyasira fernandezensis n. sp.		3829					Paratypes	Fig. 15 C	Axinulus n. sp.	66-100	31 vs [and fragments]	n/a
Thyasiridae	Thyasira fernandezensis n. sp.	312474				ex LACM 3829		Paratypes			66-100	2 vs	https://collections-zoology.fieldmuseum.org/catalogue/4677058
Thyasiridae	Thyasira fernandezensis n. sp.				101623	ex LACM 3829		Paratype(s)			66-100	2 vs	n/a
Thyasiridae	Thyasira fernandezensis n. sp.			1548477					Fig. 15 F-H (SEM)		Eltanin 21-203	10 vs	n/a
Lasaeidae	Kellia tumbesiana (Stempell, 1899)		1965-100.2						Fig. 16 A-D		65-100	1 av, 7 vs	n/a
Lasaeidae	Lasea macrodon Stempell, 1899		1965-94.4						Fig. 16 H, I	Lasaea petitiana	65-94	1 av, 1 v	n/a
Lasaeidae	Lasea macrodon Stempell, 1899		1965-102.1						Fig. 15 G		65-102	6 avs, 1 v	n/a
Lasaeidae	Lasaea macrodon Stempell, 1899	322339							Fig. 16 J, K		IOC97-50A	2 vs	https://collections-zoology.fieldmuseum.org/catalogue/4637229
Lasaeidae	Lasaea macrodon Stempell, 1899	322340									IOC97-66A	1 v	https://collections-zoology.fieldmuseum.org/catalogue/4637231
Lasaeidae	Lasea macrodon Stempell, 1899				101624	ex FMNH 322340	327903				IOC97-66A	2 vs	https://collections-zoology.fieldmuseum.org/catalogue/4677009
Lasaeidae	Lasaea macrodon Stempell, 1899	322342									IOC97-57A	1 v	https://collections-zoology.fieldmuseum.org/catalogue/4637234
Lasaeidae	Malvinasia selkirkensis n. sp.				101625	ex FMNH 322333		Holotype	Fig. 16 L, M		IOC-97050A	1 v	https://collections-zoology.fieldmuseum.org/catalogue/4677022
Lasaeidae	Malvinasia selkirkensis n. sp.	322334						Paratype(s)	Fig.16 R		IOC97-66A	1 av	https://collections-zoology.fieldmuseum.org/catalogue/4637235
Lasaeidae	Malvinasia selkirkensis n. sp.	322335						Paratype(s)	Fig. 16 N-Q		IOC97-68A	2 vs	https://collections-zoology.fieldmuseum.org/catalogue/4637235
Lasaeidae	Melliteryx platei (Stempell, 1899)	322256									IOC97-18	10 vs	https://collections-zoology.fieldmuseum.org/catalogue/4640928
Lasaeidae	Melliteryx platei (Stempell, 1899)	322255							Fig. 16 T-X (X: SEM)		IOC97-44A	5 avs, 43 vs	https://collections-zoology.fieldmuseum.org/catalogue/4640920
Lasaeidae	Melliteryx platei (Stempell, 1899)				101626	ex FMNH 322255	327904				IOC97-44A	25 vs	https://collections-zoology.fieldmuseum.org/catalogue/4671779
Lasaeidae	Melliteryx platei (Stempell, 1899)	322257									IOC97-50A	4 avs, 41 vs	https://collections-zoology.fieldmuseum.org/catalogue/4640925
Lasaeidae	Melliteryx platei (Stempell, 1899)	322258									IOC97-57A	18 vs	https://collections-zoology.fieldmuseum.org/catalogue/4640924
Lasaeidae	Melliteryx platei (Stempell, 1899)	322259									IOC97-66A	2 avs, 72 vs	https://collections-zoology.fieldmuseum.org/catalogue/4637423
Lasaeidae	Melliteryx platei (Stempell, 1899)	322260									IOC97-48A	35 vs	https://collections-zoology.fieldmuseum.org/catalogue/4637422
Lasaeidae	Melliteryx platei (Stempell, 1899)	322261									IOC97-68A	1 av, 17 vs	https://collections-zoology.fieldmuseum.org/catalogue/4637421
Lasaeidae	Melliteryx platei (Stempell, 1899)	322307									IOC97-32	1 v	https://collections-zoology.fieldmuseum.org/catalogue/4640926
Lasaeidae	Melliteryx platei (Stempell, 1899)	322308									IOC97-13	3 vs	https://collections-zoology.fieldmuseum.org/catalogue/4640929
Lasaeidae	Melliteryx platei (Stempell, 1899)	322309									IOC97-29	1 v	https://collections-zoology.fieldmuseum.org/catalogue/4640930
Lasaeidae	Melliteryx platei (Stempell, 1899)	322310									IOC97-26	1 v	https://collections-zoology.fieldmuseum.org/catalogue/4640927
Lasaeidae	Tellimya crusoensis n. sp.				101627	ex FMNH 327365		Holotype	Fig. 16 Y, Z		IOC97-44A	1 v	https://collections-zoology.fieldmuseum.org/catalogue/4677020
Lasaeidae	Tellimya crusoensis n. sp.	327364						Paratype(s)	Fig. 16 AA, BB		IOC97-50A	1 v	https://collections-zoology.fieldmuseum.org/catalogue/4637237
Lasaeidae	Tellimya crusoensis n. sp.	327366						Paratype(s)	Fig. 16 CC, DD		IOC97-50	1 v	https://collections-zoology.fieldmuseum.org/catalogue/4637239
Condylocardiidae	Condylocardia angusticostata n. sp.	322251						Paratype(s)	Fig. 17 D-G		IOC97-66A	10 vs	https://collections-zoology.fieldmuseum.org/catalogue/4637240
Condylocardiidae	Condylocardia angusticostata n. sp.				101628	ex FMNH 322251	327992	Holotype	Fig. 17 A, C		IOC97-66A	1 v	https://collections-zoology.fieldmuseum.org/catalogue/4671781
Condylocardiidae	Condylocardia angusticostata n. sp.				101629	ex FMNH 322251	327993	Paratype(s)	Fig. 17 B		IOC97-66A	1 v	https://collections-zoology.fieldmuseum.org/catalogue/4671782
Condylocardiidae	Condylocardia angusticostata n. sp.	322252							Fig. 17 H		IOC97-68A	1 av	https://collections-zoology.fieldmuseum.org/catalogue/4637241
Condylocardiidae	Condylocardia angusticostata n. sp.	322254									IOC97-44A		https://collections-zoology.fieldmuseum.org/catalogue/4637242
Condylocardiidae	Condylocardia angusticostata n. sp.		3838					Paratype(s)		Condylocardia sp.	66-100	6 v	n/a
Condylocardiidae	Condylocardia angusticostata n. sp.			1548482							Eltanin 21-203	1 av	n/a
Condylocardiidae	Condylocardiidae sp. A	322312							Fig. 17 I, K, L		IOC97-26	1 v	https://collections-zoology.fieldmuseum.org/catalogue/4637243
Condylocardiidae	Condylocardiidae sp. A	322253							Fig. 17 J, M, N (M, N: SEM)		IOC97-29	1 v	https://collections-zoology.fieldmuseum.org/catalogue/4637244
Psammobiidae	Gari sp. B		1965-101.6						Fig. 18 A, B	Gari solida	65-101	1 v	n/a
Semelidae	Ervilia producta Odhner, 1922	322240							Fig. 19 F-I		IOC97-66A	3 avs, 3vs	https://collections-zoology.fieldmuseum.org/catalogue/4637245
Semelidae	Ervilia producta Odhner, 1922				101630	ex FMNH 322240	327994				IOC97-66A	2 avs, 7 vs	https://collections-zoology.fieldmuseum.org/catalogue/4671785
Semelidae	Ervilia producta Odhner, 1922	322241									IOC97-66A	2 avs	https://collections-zoology.fieldmuseum.org/catalogue/4637246
Semelidae	Ervilia producta Odhner, 1922	322242									IOC97-68A	2 avs, 7 vs	https://collections-zoology.fieldmuseum.org/catalogue/4637253
Semelidae	Ervilia producta Odhner, 1922	322243									IOC97-50A	4 avs, 1 v	https://collections-zoology.fieldmuseum.org/catalogue/4637254
Semelidae	Ervilia producta Odhner, 1922	322300									IOC97-29	7 vs	https://collections-zoology.fieldmuseum.org/catalogue/4637254
Semelidae	Ervilia producta Odhner, 1922	322311									IOC97-26	1 av, 2 vs	https://collections-zoology.fieldmuseum.org/catalogue/4637254
Semelidae	Ervilia producta Odhner, 1922			887915						Nuculanidae		1 av, 38 vs	http://n2t.net/ark:/65665/3515b838a-13b7-46a8-8ec3-b74f04b43133
Semelidae	Ervilia producta Odhner, 1922			904373								15 avs, 61 avs	http://n2t.net/ark:/65665/333b957c0-d61a-42cd-b0e2-b4fa0f65ad9d
Semelidae	Ervilia producta Odhner, 1922		1966-98.5								66-98	1 v	n/a
Semelidae	Ervilia producta Odhner, 1922		1965-100.3								65-100	4 vs	n/a
Semelidae	Ervilia producta Odhner, 1922		1965-101.7							Ervilia galapagana	65-101	1 v	n/a
Semelidae	Ervilia producta Odhner, 1922		1966-100.5								66-100	> 100 vs	n/a
Semelidae	Ervilia producta Odhner, 1922		1966-102.3							Ervilia galapagana	66-102	4 vs	n/a
Semelidae	Ervilia producta Odhner, 1922		1966-103.1							Ervilia galapagana	66-103	35 vs	n/a
Chamidae	Chama pellucida Broderip, 1835	322319									IOC97-50	7 vs	https://collections-zoology.fieldmuseum.org/catalogue/4637257
Chamidae	Chama pellucida Broderip, 1835	322320									IOC97-62	1 v	https://collections-zoology.fieldmuseum.org/catalogue/4637264
Chamidae	Chama pellucida Broderip, 1835	322321									IOC97-57A	3 vs juvenile	https://collections-zoology.fieldmuseum.org/catalogue/4637266
Chamidae	Chama pellucida Broderip, 1835	322322									IOC97-48A	6 vs juvenile	https://collections-zoology.fieldmuseum.org/catalogue/4637267
Chamidae	Chama pellucida Broderip, 1835	322323									IOC97-44A	4 vs juvenile	https://collections-zoology.fieldmuseum.org/catalogue/4637277
Chamidae	Chama pellucida Broderip, 1835				101631	ex FMNH 322323	327995				IOC97-44A	7 vs juvenile	https://collections-zoology.fieldmuseum.org/catalogue/4671786
Chamidae	Chama pellucida Broderip, 1835	322324									IOC97-68A	11 vs	https://collections-zoology.fieldmuseum.org/catalogue/4637279
Chamidae	Chama pellucida Broderip, 1835	322325									IOC97-66A	3 vs	https://collections-zoology.fieldmuseum.org/catalogue/4637280
Chamidae	Chama pellucida Broderip, 1835	322326									IOC97-44	7 vs	https://collections-zoology.fieldmuseum.org/catalogue/4637283
Chamidae	Chama pellucida Broderip, 1835				101632	ex FMNH 322326	327996				IOC97-44	7 vs	https://collections-zoology.fieldmuseum.org/catalogue/4671788
Chamidae	Chama pellucida Broderip, 1835		1965.97.4								65-97	2 vs	n/a
Chamidae	Chama pellucida Broderip, 1835		1965-99.3						Fig. 20 E-G		65-99	5 avs, 2 vs	n/a
Chamidae	Chama pellucida Broderip, 1835		1965-103.3						Fig. 20 H-K		65-103	4 avs, 1v	n/a
Chamidae	Chama pellucida Broderip, 1835		1966-100.6								66-100	1 v juvenile	n/a
Veneridae	Paphonotia fernandesiana (Stempell, 1899)	322244							Fig. 21 B-H		IOC97-50	2 avs, 6 vs	https://collections-zoology.fieldmuseum.org/catalogue/4637285
Veneridae	Paphonotia fernandesiana (Stempell, 1899)				101633	ex FMNH 322244	327997				IOC97-50	5 vs	https://collections-zoology.fieldmuseum.org/catalogue/4671789
Veneridae	Paphonotia fernandesiana (Stempell, 1899)	322245									IOC97-68A	7 vs	https://collections-zoology.fieldmuseum.org/catalogue/4637289
Veneridae	Paphonotia fernandesiana (Stempell, 1899)	322246									IOC97-66A	4 vs	https://collections-zoology.fieldmuseum.org/catalogue/4637291
Veneridae	Paphonotia fernandesiana (Stempell, 1899)	322247									IOC97-44A	2 vs	https://collections-zoology.fieldmuseum.org/catalogue/4637294
Veneridae	Paphonotia fernandesiana (Stempell, 1899)	322248									IOC97-48A	1v	https://collections-zoology.fieldmuseum.org/catalogue/4637296
Veneridae	Paphonotia fernandesiana (Stempell, 1899)	322249									IOC97-59	6 vs, fragment	https://collections-zoology.fieldmuseum.org/catalogue/4637297
Veneridae	Paphonotia fernandesiana (Stempell, 1899)			1548480								1 av	n/a
Veneridae	Paphonotia fernandesiana (Stempell, 1899)		1965-100.7								65-100	6 vs	n/a
Veneridae	Paphonotia fernandesiana (Stempell, 1899)		1966-100.4								66-100	>200 avs + vs	n/a
Veneridae	Timoclea sanfelixensis n. sp.		3830					Holotype	Fig. 21 I-K	bivalve sp.	66-98	1 v; Fig. 21 I-K	n/a
Neoleptonidae	Neolepton sanfelixensis n. sp.	322301						Paratype(s)	Fig. 22 E, F (SEM)		IOC97-30A	7 vs	https://collections-zoology.fieldmuseum.org/catalogue/4637415
Neoleptonidae	Neolepton sanfelixensis n. sp.				101634	ex FMNH 322301	327998	Holotype	Fig. 22 A, B		IOC97-30A	1 v	https://collections-zoology.fieldmuseum.org/catalogue/4677011
Neoleptonidae	Neolepton sanfelixensis n. sp.				101635	ex FMNH 322301	327999	Paratype(s)	Fig. 22 C, D		IOC97-30A	5 vs	https://collections-zoology.fieldmuseum.org/catalogue/4677013
Neoleptonidae	Neolepton sanfelixensis n. sp.		3831			ex FMNH 322301	328000	Paratype(s)	Fig. 22 G (SEM)		IOC97-30A	2 vs	https://collections-zoology.fieldmuseum.org/catalogue/4677012
Neoleptonidae	Neolepton sanfelixensis n. sp.	322302							Fig 22 H, I (SEM)		IOC97-29	2 avs, 19 v	https://collections-zoology.fieldmuseum.org/catalogue/4637416
Neoleptonidae	Neolepton sanfelixensis n. sp.	322303									IOC97-12	1 av	https://collections-zoology.fieldmuseum.org/catalogue/4637417
Neoleptonidae	Neolepton sanfelixensis n. sp.	322304									IOC97-18	2 vs	https://collections-zoology.fieldmuseum.org/catalogue/4637420
Neoleptonidae	Neolepton sanfelixensis n. sp.	322305									IOC97-13	5 vs	https://collections-zoology.fieldmuseum.org/catalogue/4640921
Neoleptonidae	Neolepton sanfelixensis n. sp.	322306									IOC97-32	7 vs	https://collections-zoology.fieldmuseum.org/catalogue/4640922
Neoleptonidae	Neolepton sanfelixensis n. sp.	322314									IOC97-26	18 vs, 2 fragments	https://collections-zoology.fieldmuseum.org/catalogue/4640923
Neoleptonidae	Neolepton sp. A		1966-98.6						Fig. 22 J-L	Veneridae N1	66-98	1 v	n/a
Xylophagaidae	Xylophaga sp. A		1965-101.8						Fig. 23 A-D		65-101	15 avs	n/a
Teredinidae	Bankia martensi (Stempell, 1899)		1966-100.8						Fig. 24 A, B		66-100	1 v	n/a
Cuspidariidae	Cuspidaria fernandezensis n. sp.			898738				Holotype	Fig. 25 A-D	Spinula sp.	Eltanin 21-203	1 av	http://n2t.net/ark:/65665/35e3744ae-5465-4041-9a2d-b02f3fcf9bf3 link
Cuspidariidae	Cuspidaria fernandezensis n. sp.		3832					Paratype(s)	Fig. 25 E-H	Cuspidaria cf. patagonia	65-98	3 vs	n/a
Cuspidariidae	Cuspidaria fernandezensis n. sp.	312475				ex LACM 3832		Paratype(s)			65-98	1 av damaged	https://collections-zoology.fieldmuseum.org/catalogue/4677060
Cuspidariidae	Cuspidaria sanfelixensis n. sp.		3833					Holotype	Fig. 25 I, J	Cuspidaria chilensis	66-98	1 v	n/a
Cuspidariidae	Cuspidaria sanfelixensis n. sp.		3834					Paratype(s)	Fig. 25 K-N	bivalve sp.	66-98	2 vs [plus 7 fragments]	n/a
Cuspidariidae	Cuspidaria sanfelixensis n. sp.	312476				ex LACM 3834		Paratype(s)	Fig. 25 O, P		66-98	1 v	https://collections-zoology.fieldmuseum.org/catalogue/4677061
Halonymphidae	Halonympha recurvirostris n. sp.		3836					Holotype	Fig. 26 A, B		66-98	1 v	n/a
Pandoridae	Pandora pyxis n. sp.		3837					Holotype	Fig. 27 A-D	Pandora cistula	65-101	1 av	n/a
Lyonsiidae	Entodesma sp.		1966-98.7						Fig. 28 A-B	Entodesma cuneatum	66-98	1 v	n/a
Paralimyidae	Panacca chilensis Coan, 2000		2876						Fig. 29 A, B				n/a
